# Supplementary material for: Oxygen diffusion in ceria doped with rare-earth elements
Source: Royal Society of Chemistry journal article supplement (doi:10.1039/c6cp06460d), 2017-01-01
Supplement: c6cp06460d1.pdf [file c6cp06460d1.pdf]

## Supplementary material: Oxygen diffusion in ceria doped with rare-earth elements

In this supplementary we provide the simulation cell, the possible oxygen ion transitions in the simulation cell and the corresponding barriers in a format so that the interested reader can set up and run their own KMC simulations for ceria doped with Pr, Nd, Pm, Sm, Eu, and Gd, in four different distributions. The doped CeO<sub>2</sub> simulation cell and the dopant distributions are given in Sec. S1, and the coordinates of the oxygen sites in the simulation cell are given in Sec. S2. In Sec. S3 are the barriers for the symmetrically unique transitions in the model system (see Fig. S1) for all the dopant elements tabulated for the different distribution (Tables S2, S3, S4, and S5). Notice that there are 384 possible transitions in the system in total, but many are symmetrically identical, i.e., although they are between different sites in the system, they are identical, and correspond to the same diffusion barrier. In the barrier tables in Sec. S3 are all the symmetrically identical transitions grouped together. The barriers were calculated with DFT at 0 K using the PBE functional and a lattice constant of  $a = 5.47 \text{ \AA}$  (see paper for more details). The supplementary also contains plots of calculated diffusion constant versus temperature for the different dopants grouped by dopant distribution (Sec. S4), and a table of the difference between the forward and backward barriers averaged over the studied system (Sec. S5).

### S1. STRUCTURE

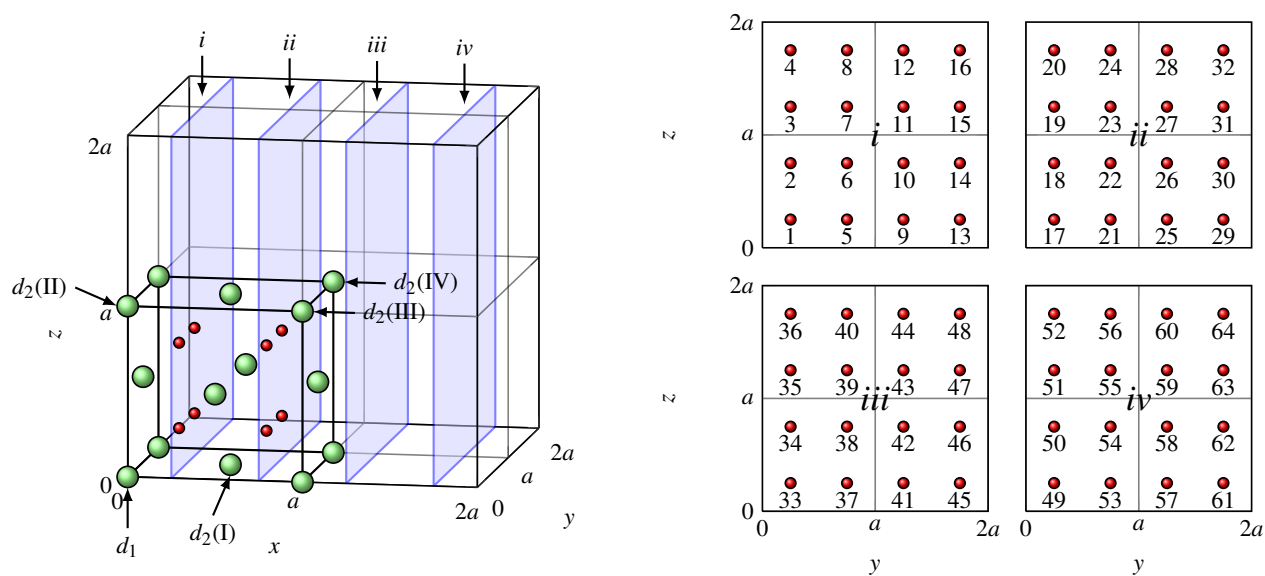

FIG. S1. (LEFT: The  $2 \times 2 \times 2$  (96 sites) cerium oxide supercell structure is shown in thin lines and the cerium oxide unit cell in thick lines. Large green circles are Ce atoms and red small circles are O atoms. From the supercell one O atom is removed to create a vacancy, and two Ce atoms are replaced by dopant atoms ( $d_1, d_2$ ) at positions:  $d_1=(0, 0, 0)$ , and  $d_2 \in \{(a/2, a/2, 0), (0, 0, a), (a, 0, a), (a, a, a)\}$ , marked by small arrows in the figure. Roman numerals I–IV mark the different dopant distributions.  $a$  is the lattice constant. The four layers of oxygen atoms in the YZ-plane are shown in blue and marked  $i$ – $iv$ . RIGHT: The four layers ( $i$ – $iv$ ) of the supercell with oxygen site indices 1–64. Upper right plane is layer  $i$ , the upper left is layer  $ii$ , lower left is layer  $iii$ , and the lower right is layer  $iv$ .

## S2. OXYGEN SITE COORDINATES AND COORDINATION

TABLE S1: Oxygen ideal site fractional coordinates (x, y, z) in the simulation cell numbered 1–64 (Site idx), and the corresponding dopant coordination ( $n_1, n_2$ ) of the oxygen site, for the different dopant distributions (I–IV) in Fig. S1.

| Site idx | Coordinate |       |       | Coordination per distr. |        |        |        |
|----------|------------|-------|-------|-------------------------|--------|--------|--------|
|          | x          | y     | z     | I                       | II     | III    | IV     |
| 1        | 0.125      | 0.125 | 0.125 | (1, 1)                  | (1, 2) | (1, 3) | (1, 4) |
| 2        | 0.125      | 0.125 | 0.375 | (2, 2)                  | (1, 2) | (2, 2) | (2, 3) |
| 3        | 0.125      | 0.125 | 0.625 | (2, 2)                  | (1, 2) | (2, 2) | (2, 3) |
| 4        | 0.125      | 0.125 | 0.875 | (1, 1)                  | (1, 2) | (1, 3) | (1, 4) |
| 5        | 0.125      | 0.375 | 0.125 | (1, 2)                  | (2, 3) | (2, 4) | (2, 3) |
| 6        | 0.125      | 0.375 | 0.375 | (2, 3)                  | (2, 3) | (3, 3) | (2, 3) |
| 7        | 0.125      | 0.375 | 0.625 | (2, 3)                  | (2, 3) | (3, 3) | (2, 3) |
| 8        | 0.125      | 0.375 | 0.875 | (1, 2)                  | (2, 3) | (2, 4) | (2, 3) |
| 9        | 0.125      | 0.625 | 0.125 | (2, 2)                  | (2, 3) | (2, 4) | (2, 3) |
| 10       | 0.125      | 0.625 | 0.375 | (3, 3)                  | (2, 3) | (3, 3) | (2, 3) |
| 11       | 0.125      | 0.625 | 0.625 | (3, 3)                  | (2, 3) | (3, 3) | (2, 3) |
| 12       | 0.125      | 0.625 | 0.875 | (2, 2)                  | (2, 3) | (2, 4) | (2, 3) |
| 13       | 0.125      | 0.875 | 0.125 | (1, 2)                  | (1, 2) | (1, 3) | (1, 4) |
| 14       | 0.125      | 0.875 | 0.375 | (2, 3)                  | (1, 2) | (2, 2) | (2, 3) |
| 15       | 0.125      | 0.875 | 0.625 | (2, 3)                  | (1, 2) | (2, 2) | (2, 3) |
| 16       | 0.125      | 0.875 | 0.875 | (1, 2)                  | (1, 2) | (1, 3) | (1, 4) |
| 17       | 0.375      | 0.125 | 0.125 | (1, 2)                  | (2, 3) | (2, 2) | (2, 3) |
| 18       | 0.375      | 0.125 | 0.375 | (2, 3)                  | (2, 3) | (1, 3) | (2, 3) |
| 19       | 0.375      | 0.125 | 0.625 | (2, 3)                  | (2, 3) | (1, 3) | (2, 3) |
| 20       | 0.375      | 0.125 | 0.875 | (1, 2)                  | (2, 3) | (2, 2) | (2, 3) |
| 21       | 0.375      | 0.375 | 0.125 | (1, 3)                  | (3, 4) | (3, 3) | (2, 3) |
| 22       | 0.375      | 0.375 | 0.375 | (2, 4)                  | (3, 4) | (2, 4) | (1, 4) |
| 23       | 0.375      | 0.375 | 0.625 | (2, 4)                  | (3, 4) | (2, 4) | (1, 4) |
| 24       | 0.375      | 0.375 | 0.875 | (1, 3)                  | (3, 4) | (3, 3) | (2, 3) |
| 25       | 0.375      | 0.625 | 0.125 | (2, 3)                  | (3, 4) | (3, 3) | (2, 3) |
| 26       | 0.375      | 0.625 | 0.375 | (3, 4)                  | (3, 4) | (2, 4) | (1, 4) |
| 27       | 0.375      | 0.625 | 0.625 | (3, 4)                  | (3, 4) | (2, 4) | (1, 4) |
| 28       | 0.375      | 0.625 | 0.875 | (2, 3)                  | (3, 4) | (3, 3) | (2, 3) |
| 29       | 0.375      | 0.875 | 0.125 | (2, 2)                  | (2, 3) | (2, 2) | (2, 3) |
| 30       | 0.375      | 0.875 | 0.375 | (3, 3)                  | (2, 3) | (1, 3) | (2, 3) |
| 31       | 0.375      | 0.875 | 0.625 | (3, 3)                  | (2, 3) | (1, 3) | (2, 3) |
| 32       | 0.375      | 0.875 | 0.875 | (2, 2)                  | (2, 3) | (2, 2) | (2, 3) |
| 33       | 0.625      | 0.125 | 0.125 | (2, 2)                  | (2, 3) | (2, 2) | (2, 3) |
| 34       | 0.625      | 0.125 | 0.375 | (3, 3)                  | (2, 3) | (1, 3) | (2, 3) |
| 35       | 0.625      | 0.125 | 0.625 | (3, 3)                  | (2, 3) | (1, 3) | (2, 3) |
| 36       | 0.625      | 0.125 | 0.875 | (2, 2)                  | (2, 3) | (2, 2) | (2, 3) |
| 37       | 0.625      | 0.375 | 0.125 | (2, 3)                  | (3, 4) | (3, 3) | (2, 3) |
| 38       | 0.625      | 0.375 | 0.375 | (3, 4)                  | (3, 4) | (2, 4) | (1, 4) |
| 39       | 0.625      | 0.375 | 0.625 | (3, 4)                  | (3, 4) | (2, 4) | (1, 4) |
| 40       | 0.625      | 0.375 | 0.875 | (2, 3)                  | (3, 4) | (3, 3) | (2, 3) |
| 41       | 0.625      | 0.625 | 0.125 | (3, 3)                  | (3, 4) | (3, 3) | (2, 3) |
| 42       | 0.625      | 0.625 | 0.375 | (4, 4)                  | (3, 4) | (2, 4) | (1, 4) |
| 43       | 0.625      | 0.625 | 0.625 | (4, 4)                  | (3, 4) | (2, 4) | (1, 4) |
| 44       | 0.625      | 0.625 | 0.875 | (3, 3)                  | (3, 4) | (3, 3) | (2, 3) |
| 45       | 0.625      | 0.875 | 0.125 | (2, 3)                  | (2, 3) | (2, 2) | (2, 3) |
| 46       | 0.625      | 0.875 | 0.375 | (3, 4)                  | (2, 3) | (1, 3) | (2, 3) |
| 47       | 0.625      | 0.875 | 0.625 | (3, 4)                  | (2, 3) | (1, 3) | (2, 3) |
| 48       | 0.625      | 0.875 | 0.875 | (2, 3)                  | (2, 3) | (2, 2) | (2, 3) |
| 49       | 0.875      | 0.125 | 0.125 | (1, 2)                  | (1, 2) | (1, 3) | (1, 4) |
| 50       | 0.875      | 0.125 | 0.375 | (2, 3)                  | (1, 2) | (2, 2) | (2, 3) |
| 51       | 0.875      | 0.125 | 0.625 | (2, 3)                  | (1, 2) | (2, 2) | (2, 3) |
| 52       | 0.875      | 0.125 | 0.875 | (1, 2)                  | (1, 2) | (1, 3) | (1, 4) |
| 53       | 0.875      | 0.375 | 0.125 | (2, 2)                  | (2, 3) | (2, 4) | (2, 3) |
| 54       | 0.875      | 0.375 | 0.375 | (3, 3)                  | (2, 3) | (3, 3) | (2, 3) |

|    |       |       |       |        |        |        |        |
|----|-------|-------|-------|--------|--------|--------|--------|
| 55 | 0.875 | 0.375 | 0.625 | (3, 3) | (2, 3) | (3, 3) | (2, 3) |
| 56 | 0.875 | 0.375 | 0.875 | (2, 2) | (2, 3) | (2, 4) | (2, 3) |
| 57 | 0.875 | 0.625 | 0.125 | (2, 3) | (2, 3) | (2, 4) | (2, 3) |
| 58 | 0.875 | 0.625 | 0.375 | (3, 4) | (2, 3) | (3, 3) | (2, 3) |
| 59 | 0.875 | 0.625 | 0.625 | (3, 4) | (2, 3) | (3, 3) | (2, 3) |
| 60 | 0.875 | 0.625 | 0.875 | (2, 3) | (2, 3) | (2, 4) | (2, 3) |
| 61 | 0.875 | 0.875 | 0.125 | (1, 3) | (1, 2) | (1, 3) | (1, 4) |
| 62 | 0.875 | 0.875 | 0.375 | (2, 4) | (1, 2) | (2, 2) | (2, 3) |
| 63 | 0.875 | 0.875 | 0.625 | (2, 4) | (1, 2) | (2, 2) | (2, 3) |
| 64 | 0.875 | 0.875 | 0.875 | (1, 3) | (1, 2) | (1, 3) | (1, 4) |

## S3. BARRIERS

TABLE S2: Oxygen vacancy diffusion barriers for dopants in distribution I (see Fig. S1). Transitions are between oxygen sites with indices defined in Table. S1. The first barrier value is the forward barrier in direction of the arrow in the "Transition" column ( $a \rightarrow b$ ), and the second value is the reverse barrier ( $a \leftarrow b$ ).

| No. | Transition of O vacancy                                | Barriers [eV] |            |            |            |            |            |
|-----|--------------------------------------------------------|---------------|------------|------------|------------|------------|------------|
|     |                                                        | Pr            | Nd         | Pm         | Sm         | Eu         | Gd         |
| 1   | 1→2, 4→3                                               | 0.28, 0.45    | 0.33, 0.43 | 0.38, 0.40 | 0.42, 0.38 | 0.46, 0.35 | 0.50, 0.32 |
| 2   | 1→4, 4→1                                               | 1.33, 1.33    | 1.21, 1.21 | 1.10, 1.10 | 1.03, 1.03 | 0.95, 0.95 | 0.88, 0.88 |
| 3   | 1→5, 1→13, 1→17, 1→49, 4→8, 4→16, 4→20, 4→52           | 0.59, 0.66    | 0.59, 0.62 | 0.58, 0.58 | 0.57, 0.55 | 0.56, 0.50 | 0.55, 0.46 |
| 4   | 2→3, 3→2                                               | 0.34, 0.34    | 0.36, 0.36 | 0.37, 0.37 | 0.38, 0.38 | 0.40, 0.40 | 0.41, 0.41 |
| 5   | 2→1, 3→4                                               | 0.45, 0.28    | 0.43, 0.33 | 0.40, 0.38 | 0.38, 0.42 | 0.35, 0.46 | 0.32, 0.50 |
| 6   | 2→6, 2→14, 2→18, 2→50, 3→7, 3→15, 3→19, 3→51           | 0.56, 0.40    | 0.54, 0.41 | 0.52, 0.42 | 0.50, 0.43 | 0.49, 0.43 | 0.48, 0.44 |
| 7   | 5→6, 8→7, 13→14, 16→15, 17→18, 20→19, 49→50, 52→51     | 0.44, 0.40    | 0.46, 0.40 | 0.47, 0.39 | 0.48, 0.39 | 0.49, 0.38 | 0.50, 0.37 |
| 8   | 5→8, 8→5, 13→16, 16→13, 17→20, 20→17, 49→52, 52→49     | 0.73, 0.73    | 0.68, 0.68 | 0.63, 0.63 | 0.60, 0.60 | 0.57, 0.57 | 0.54, 0.54 |
| 9   | 5→9, 8→12, 13→9, 16→12, 17→33, 20→36, 49→33, 52→36     | 0.31, 0.39    | 0.35, 0.39 | 0.38, 0.39 | 0.41, 0.38 | 0.44, 0.37 | 0.46, 0.36 |
| 10  | 5→1, 8→4, 13→1, 16→4, 17→1, 20→4, 49→1, 52→4           | 0.66, 0.59    | 0.62, 0.59 | 0.58, 0.58 | 0.55, 0.57 | 0.50, 0.56 | 0.46, 0.55 |
| 11  | 5→21, 8→24, 13→61, 16→64, 17→21, 20→24, 49→61, 52→64   | 0.78, 0.67    | 0.73, 0.64 | 0.67, 0.60 | 0.63, 0.57 | 0.59, 0.55 | 0.56, 0.53 |
| 12  | 5→53, 8→56, 13→29, 16→32, 17→29, 20→32, 49→53, 52→56   | 0.36, 0.44    | 0.39, 0.43 | 0.42, 0.42 | 0.44, 0.41 | 0.47, 0.40 | 0.49, 0.38 |
| 13  | 6→7, 7→6, 14→15, 15→14, 18→19, 19→18, 50→51, 51→50     | 0.40, 0.40    | 0.40, 0.40 | 0.41, 0.41 | 0.41, 0.41 | 0.41, 0.41 | 0.41, 0.41 |
| 14  | 6→5, 7→8, 14→13, 15→16, 18→17, 19→20, 50→49, 51→52     | 0.40, 0.44    | 0.40, 0.46 | 0.39, 0.47 | 0.39, 0.48 | 0.38, 0.49 | 0.37, 0.50 |
| 15  | 6→10, 7→11, 14→10, 15→11, 18→34, 19→35, 50→34, 51→35   | 0.52, 0.40    | 0.50, 0.41 | 0.48, 0.41 | 0.47, 0.41 | 0.46, 0.42 | 0.45, 0.42 |
| 16  | 6→2, 7→3, 14→2, 15→3, 18→2, 19→3, 50→2, 51→3           | 0.40, 0.56    | 0.41, 0.54 | 0.42, 0.52 | 0.43, 0.50 | 0.43, 0.49 | 0.44, 0.48 |
| 17  | 6→22, 7→23, 14→62, 15→63, 18→22, 19→23, 50→62, 51→63   | 0.45, 0.45    | 0.45, 0.45 | 0.45, 0.44 | 0.45, 0.44 | 0.45, 0.43 | 0.45, 0.43 |
| 18  | 6→54, 7→55, 14→30, 15→31, 18→30, 19→31, 50→54, 51→55   | 0.54, 0.42    | 0.52, 0.42 | 0.50, 0.43 | 0.48, 0.43 | 0.47, 0.43 | 0.46, 0.44 |
| 19  | 9→10, 12→11, 33→34, 36→35                              | 0.61, 0.37    | 0.58, 0.38 | 0.55, 0.40 | 0.53, 0.41 | 0.50, 0.42 | 0.49, 0.43 |
| 20  | 9→12, 12→9, 33→36, 36→33                               | 0.46, 0.46    | 0.46, 0.46 | 0.46, 0.46 | 0.46, 0.46 | 0.46, 0.46 | 0.46, 0.46 |
| 21  | 9→13, 9→5, 12→16, 12→8, 33→49, 33→17, 36→52, 36→20     | 0.39, 0.31    | 0.39, 0.35 | 0.39, 0.38 | 0.38, 0.41 | 0.37, 0.44 | 0.36, 0.46 |
| 22  | 9→25, 9→57, 12→28, 12→60, 33→37, 33→45, 36→40, 36→48   | 0.53, 0.41    | 0.52, 0.42 | 0.50, 0.42 | 0.49, 0.43 | 0.48, 0.44 | 0.47, 0.44 |
| 23  | 10→11, 11→10, 34→35, 35→34                             | 0.44, 0.44    | 0.44, 0.44 | 0.43, 0.43 | 0.42, 0.42 | 0.42, 0.42 | 0.41, 0.41 |
| 24  | 10→9, 11→12, 34→33, 35→36                              | 0.37, 0.61    | 0.38, 0.58 | 0.40, 0.55 | 0.41, 0.53 | 0.42, 0.50 | 0.43, 0.49 |
| 25  | 10→14, 10→6, 11→15, 11→7, 34→50, 34→18, 35→51, 35→19   | 0.40, 0.52    | 0.41, 0.50 | 0.41, 0.48 | 0.41, 0.47 | 0.42, 0.46 | 0.42, 0.45 |
| 26  | 10→26, 10→58, 11→27, 11→59, 34→38, 34→46, 35→39, 35→47 | 0.45, 0.46    | 0.44, 0.45 | 0.44, 0.44 | 0.44, 0.43 | 0.44, 0.43 | 0.44, 0.42 |
| 27  | 21→22, 24→23, 61→62, 64→63                             | 0.35, 0.42    | 0.38, 0.41 | 0.41, 0.40 | 0.43, 0.39 | 0.45, 0.37 | 0.47, 0.35 |
| 28  | 21→24, 24→21, 61→64, 64→61                             | 0.71, 0.71    | 0.67, 0.67 | 0.62, 0.62 | 0.59, 0.59 | 0.56, 0.56 | 0.53, 0.53 |
| 29  | 21→25, 21→37, 24→28, 24→40, 61→57, 61→45, 64→60, 64→48 | 0.35, 0.42    | 0.38, 0.41 | 0.41, 0.40 | 0.42, 0.39 | 0.44, 0.38 | 0.46, 0.36 |
| 30  | 21→17, 21→5, 24→20, 24→8, 61→49, 61→13, 64→52, 64→16   | 0.67, 0.78    | 0.64, 0.73 | 0.60, 0.67 | 0.57, 0.63 | 0.55, 0.59 | 0.53, 0.56 |
| 31  | 22→23, 23→22, 62→63, 63→62                             | 0.39, 0.39    | 0.40, 0.40 | 0.41, 0.41 | 0.41, 0.41 | 0.42, 0.42 | 0.42, 0.42 |
| 32  | 22→21, 23→24, 62→61, 63→64                             | 0.42, 0.35    | 0.41, 0.38 | 0.40, 0.41 | 0.39, 0.43 | 0.37, 0.45 | 0.35, 0.47 |
| 33  | 22→26, 22→38, 23→27, 23→39, 62→58, 62→46, 63→59, 63→47 | 0.51, 0.39    | 0.50, 0.40 | 0.48, 0.41 | 0.48, 0.42 | 0.46, 0.42 | 0.46, 0.43 |
| 34  | 22→18, 22→6, 23→19, 23→7, 62→50, 62→14, 63→51, 63→15   | 0.45, 0.45    | 0.45, 0.45 | 0.44, 0.45 | 0.44, 0.45 | 0.43, 0.45 | 0.43, 0.45 |
| 35  | 25→26, 28→27, 37→38, 40→39, 45→46, 48→47, 57→58, 60→59 | 0.52, 0.40    | 0.50, 0.41 | 0.49, 0.41 | 0.48, 0.41 | 0.47, 0.42 | 0.46, 0.42 |
| 36  | 25→28, 28→25, 37→40, 40→37, 45→48, 48→45, 57→60, 60→57 | 0.46, 0.46    | 0.46, 0.46 | 0.46, 0.46 | 0.45, 0.45 | 0.45, 0.45 | 0.45, 0.45 |
| 37  | 25→29, 28→32, 37→53, 40→56, 45→29, 48→32, 57→53, 60→56 | 0.36, 0.47    | 0.37, 0.47 | 0.39, 0.46 | 0.40, 0.46 | 0.41, 0.45 | 0.42, 0.45 |

|    |                                                        |            |            |            |            |            |            |
|----|--------------------------------------------------------|------------|------------|------------|------------|------------|------------|
| 38 | 25→21, 28→24, 37→21, 40→24, 45→61, 48→64, 57→61, 60→64 | 0.42, 0.35 | 0.41, 0.38 | 0.40, 0.41 | 0.39, 0.42 | 0.38, 0.44 | 0.36, 0.46 |
| 39 | 25→41, 28→44, 37→41, 40→44, 45→41, 48→44, 57→41, 60→44 | 0.53, 0.40 | 0.51, 0.41 | 0.49, 0.41 | 0.48, 0.41 | 0.46, 0.42 | 0.45, 0.42 |
| 40 | 25→9, 28→12, 37→33, 40→36, 45→33, 48→36, 57→9, 60→12   | 0.41, 0.53 | 0.42, 0.52 | 0.42, 0.50 | 0.43, 0.49 | 0.44, 0.48 | 0.44, 0.47 |
| 41 | 26→27, 27→26, 38→39, 39→38, 46→47, 47→46, 58→59, 59→58 | 0.43, 0.43 | 0.43, 0.43 | 0.43, 0.43 | 0.43, 0.43 | 0.42, 0.42 | 0.42, 0.42 |
| 42 | 26→25, 27→28, 38→37, 39→40, 46→45, 47→48, 58→57, 59→60 | 0.40, 0.52 | 0.41, 0.50 | 0.41, 0.49 | 0.41, 0.48 | 0.42, 0.47 | 0.42, 0.46 |
| 43 | 26→30, 27→31, 38→54, 39→55, 46→30, 47→31, 58→54, 59→55 | 0.44, 0.43 | 0.43, 0.43 | 0.42, 0.43 | 0.42, 0.43 | 0.41, 0.43 | 0.40, 0.42 |
| 44 | 26→22, 27→23, 38→22, 39→23, 46→62, 47→63, 58→62, 59→63 | 0.39, 0.51 | 0.40, 0.50 | 0.41, 0.48 | 0.42, 0.48 | 0.42, 0.46 | 0.43, 0.46 |
| 45 | 26→42, 27→43, 38→42, 39→43, 46→42, 47→43, 58→42, 59→43 | 0.43, 0.44 | 0.44, 0.44 | 0.43, 0.43 | 0.43, 0.42 | 0.43, 0.42 | 0.43, 0.42 |
| 46 | 26→10, 27→11, 38→34, 39→35, 46→34, 47→35, 58→10, 59→11 | 0.46, 0.45 | 0.45, 0.44 | 0.44, 0.44 | 0.43, 0.44 | 0.43, 0.44 | 0.42, 0.44 |
| 47 | 29→30, 32→31, 53→54, 56→55                             | 0.61, 0.37 | 0.57, 0.39 | 0.54, 0.40 | 0.52, 0.41 | 0.50, 0.42 | 0.48, 0.43 |
| 48 | 29→32, 32→29, 53→56, 56→53                             | 0.46, 0.46 | 0.45, 0.45 | 0.45, 0.45 | 0.45, 0.45 | 0.45, 0.45 | 0.45, 0.45 |
| 49 | 29→17, 29→13, 32→20, 32→16, 53→49, 53→5, 56→52, 56→8   | 0.44, 0.36 | 0.43, 0.39 | 0.42, 0.42 | 0.41, 0.44 | 0.40, 0.47 | 0.38, 0.49 |
| 50 | 29→25, 29→45, 32→28, 32→48, 53→57, 53→37, 56→60, 56→40 | 0.47, 0.36 | 0.47, 0.37 | 0.46, 0.39 | 0.46, 0.40 | 0.45, 0.41 | 0.45, 0.42 |
| 51 | 30→31, 31→30, 54→55, 55→54                             | 0.44, 0.44 | 0.43, 0.43 | 0.42, 0.42 | 0.42, 0.42 | 0.41, 0.41 | 0.41, 0.41 |
| 52 | 30→29, 31→32, 54→53, 55→56                             | 0.37, 0.61 | 0.39, 0.57 | 0.40, 0.54 | 0.41, 0.52 | 0.42, 0.50 | 0.43, 0.48 |
| 53 | 30→18, 30→14, 31→19, 31→15, 54→50, 54→6, 55→51, 55→7   | 0.42, 0.54 | 0.42, 0.52 | 0.43, 0.50 | 0.43, 0.48 | 0.43, 0.47 | 0.44, 0.46 |
| 54 | 30→26, 30→46, 31→27, 31→47, 54→58, 54→38, 55→59, 55→39 | 0.43, 0.44 | 0.43, 0.43 | 0.43, 0.42 | 0.43, 0.42 | 0.43, 0.41 | 0.42, 0.40 |
| 55 | 41→42, 44→43                                           | 0.42, 0.45 | 0.43, 0.44 | 0.43, 0.43 | 0.43, 0.42 | 0.43, 0.41 | 0.43, 0.41 |
| 56 | 41→44, 44→41                                           | 0.47, 0.47 | 0.46, 0.46 | 0.45, 0.45 | 0.45, 0.45 | 0.44, 0.44 | 0.44, 0.44 |
| 57 | 41→45, 41→37, 41→57, 41→25, 44→48, 44→40, 44→60, 44→28 | 0.40, 0.53 | 0.41, 0.51 | 0.41, 0.49 | 0.41, 0.48 | 0.42, 0.46 | 0.42, 0.45 |
| 58 | 42→43, 43→42                                           | 0.42, 0.42 | 0.42, 0.42 | 0.43, 0.43 | 0.43, 0.43 | 0.43, 0.43 | 0.43, 0.43 |
| 59 | 42→41, 43→44                                           | 0.45, 0.42 | 0.44, 0.43 | 0.43, 0.43 | 0.42, 0.43 | 0.41, 0.43 | 0.41, 0.43 |
| 60 | 42→46, 42→38, 42→58, 42→26, 43→47, 43→39, 43→59, 43→27 | 0.51, 0.50 | 0.43, 0.43 | 0.43, 0.43 | 0.42, 0.43 | 0.42, 0.43 | 0.42, 0.43 |

TABLE S3: Oxygen vacancy diffusion barriers for dopants in distribution II (see Fig. S1). Transitions are between oxygen site with indices defined in Table. S1. The first barrier value is the forward barrier in direction of the arrow in the "Transition" column ( $a \rightarrow b$ ), and the second value is the reverse barrier ( $a \leftarrow b$ ).

| No. | Transition of O vacancy                                                                                                                                                                                                   | Barriers [eV] |            |            |            |            |            |
|-----|---------------------------------------------------------------------------------------------------------------------------------------------------------------------------------------------------------------------------|---------------|------------|------------|------------|------------|------------|
|     |                                                                                                                                                                                                                           | Pr            | Nd         | Pm         | Sm         | Eu         | Gd         |
| 1   | 1→2, 2→1, 3→4, 4→3, 13→14, 14→13, 15→16, 16→15, 49→50, 50→49, 51→52, 52→51, 61→62, 62→61, 63→64, 64→63                                                                                                                    | 0.32, 0.32    | 0.35, 0.35 | 0.38, 0.38 | 0.39, 0.39 | 0.40, 0.40 | 0.40, 0.40 |
| 2   | 1→4, 2→3, 3→2, 4→1, 13→16, 14→15, 15→14, 16→13, 49→52, 50→51, 51→50, 52→49, 61→64, 62→63, 63→62, 64→61                                                                                                                    | 0.65, 0.65    | 0.61, 0.61 | 0.58, 0.58 | 0.56, 0.56 | 0.54, 0.54 | 0.51, 0.51 |
| 3   | 1→5, 1→17, 2→6, 2→18, 3→7, 3→19, 4→8, 4→20, 13→9, 13→29, 14→10, 14→30, 15→11, 15→31, 16→12, 16→32, 49→53, 49→33, 50→54, 50→34, 51→55, 51→35, 52→56, 52→36, 61→57, 61→45, 62→58, 62→46, 63→59, 63→47, 64→60, 64→48         | 0.42, 0.37    | 0.44, 0.38 | 0.46, 0.38 | 0.47, 0.38 | 0.49, 0.38 | 0.49, 0.36 |
| 4   | 1→13, 1→49, 2→14, 2→50, 3→15, 3→51, 4→16, 4→52, 13→1, 13→61, 14→2, 14→62, 15→3, 15→63, 16→4, 16→64, 49→61, 49→1, 50→62, 50→2, 51→63, 51→3, 52→64, 52→4, 61→49, 61→13, 62→50, 62→14, 63→51, 63→15, 64→52, 64→16            | 0.72, 0.72    | 0.68, 0.68 | 0.63, 0.63 | 0.60, 0.60 | 0.57, 0.57 | 0.54, 0.54 |
| 5   | 5→6, 6→5, 7→8, 8→7, 9→10, 10→9, 11→12, 12→11, 17→18, 18→17, 19→20, 20→19, 29→30, 30→29, 31→32, 32→31, 33→34, 34→33, 35→36, 36→35, 45→46, 46→45, 47→48, 48→47, 53→54, 54→53, 55→56, 56→55, 57→58, 58→57, 59→60, 60→59      | 0.48, 0.48    | 0.47, 0.47 | 0.47, 0.47 | 0.46, 0.46 | 0.46, 0.46 | 0.46, 0.46 |
| 6   | 5→8, 6→7, 7→6, 8→5, 9→12, 10→11, 11→10, 12→9, 17→20, 18→19, 19→18, 20→17, 29→32, 30→31, 31→30, 32→29, 33→36, 34→35, 35→34, 36→33, 45→48, 46→47, 47→46, 48→45, 53→56, 54→55, 55→54, 56→53, 57→60, 58→59, 59→58, 60→57      | 0.46, 0.46    | 0.45, 0.45 | 0.44, 0.44 | 0.44, 0.44 | 0.44, 0.44 | 0.44, 0.44 |
| 7   | 5→9, 6→10, 7→11, 8→12, 9→5, 10→6, 11→7, 12→8, 17→33, 18→34, 19→35, 20→36, 29→45, 30→46, 31→47, 32→48, 33→17, 34→18, 35→19, 36→20, 45→29, 46→30, 47→31, 48→32, 53→57, 54→58, 55→59, 56→60, 57→53, 58→54, 59→55, 60→56      | 0.39, 0.39    | 0.40, 0.40 | 0.40, 0.40 | 0.41, 0.41 | 0.41, 0.41 | 0.41, 0.41 |
| 8   | 5→1, 6→2, 7→3, 8→4, 9→13, 10→14, 11→15, 12→16, 17→1, 18→2, 19→3, 20→4, 29→13, 30→14, 31→15, 32→16, 33→49, 34→50, 35→51, 36→52, 45→61, 46→62, 47→63, 48→64, 53→49, 54→50, 55→51, 56→52, 57→61, 58→62, 59→63, 60→64         | 0.37, 0.42    | 0.38, 0.44 | 0.38, 0.46 | 0.38, 0.47 | 0.38, 0.49 | 0.36, 0.49 |
| 9   | 5→21, 6→22, 7→23, 8→24, 9→25, 10→26, 11→27, 12→28, 17→21, 18→22, 19→23, 20→24, 29→25, 30→26, 31→27, 32→28, 33→37, 34→38, 35→39, 36→40, 45→41, 46→42, 47→43, 48→44, 53→37, 54→38, 55→39, 56→40, 57→41, 58→42, 59→43, 60→44 | 0.52, 0.41    | 0.51, 0.41 | 0.49, 0.41 | 0.48, 0.41 | 0.47, 0.42 | 0.46, 0.42 |
| 10  | 5→53, 6→54, 7→55, 8→56, 9→57, 10→58, 11→59, 12→60, 17→29, 18→30, 19→31, 20→32, 29→17, 30→18, 31→19, 32→20, 33→45, 34→46, 35→47, 36→48, 45→33, 46→34, 47→35, 48→36, 53→5, 54→6, 55→7, 56→8, 57→9, 58→10, 59→11, 60→12      | 0.47, 0.47    | 0.46, 0.46 | 0.46, 0.46 | 0.45, 0.45 | 0.45, 0.45 | 0.45, 0.45 |
| 11  | 21→22, 22→21, 23→24, 24→23, 25→26, 26→25, 27→28, 28→27, 37→38, 38→37, 39→40, 40→39, 41→42, 42→41, 43→44, 44→43                                                                                                            | 0.44, 0.44    | 0.43, 0.43 | 0.43, 0.43 | 0.43, 0.43 | 0.42, 0.42 | 0.42, 0.42 |
| 12  | 21→24, 22→23, 23→22, 24→21, 25→28, 26→27, 27→26, 28→25, 37→40, 38→39, 39→38, 40→37, 41→44, 42→43, 43→42, 44→41                                                                                                            | 0.45, 0.45    | 0.44, 0.44 | 0.44, 0.44 | 0.44, 0.44 | 0.43, 0.43 | 0.43, 0.43 |

|    |                                                                                                                                                                                                                                            |            |            |            |            |            |            |
|----|--------------------------------------------------------------------------------------------------------------------------------------------------------------------------------------------------------------------------------------------|------------|------------|------------|------------|------------|------------|
| 13 | 21→25, 21→37, 22→26, 22→38, 23→27, 23→39, 24→28,<br>24→40, 25→21, 25→41, 26→22, 26→42, 27→23, 27→43,<br>28→24, 28→44, 37→41, 37→21, 38→42, 38→22, 39→43,<br>39→23, 40→44, 40→24, 41→37, 41→25, 42→38, 42→26,<br>43→39, 43→27, 44→40, 44→28 | 0.43, 0.43 | 0.43, 0.43 | 0.43, 0.43 | 0.42, 0.42 | 0.42, 0.42 | 0.42, 0.42 |
| 14 | 21→17, 21→5, 22→18, 22→6, 23→19, 23→7, 24→20,<br>24→8, 25→29, 25→9, 26→30, 26→10, 27→31, 27→11,<br>28→32, 28→12, 37→33, 37→53, 38→34, 38→54, 39→35,<br>39→55, 40→36, 40→56, 41→45, 41→57, 42→46, 42→58,<br>43→47, 43→59, 44→48, 44→60      | 0.41, 0.52 | 0.41, 0.51 | 0.41, 0.49 | 0.41, 0.48 | 0.42, 0.47 | 0.42, 0.46 |

TABLE S4: Oxygen vacancy diffusion barriers for dopants in distribution III (see Fig. S1). Transitions are between oxygen sites with indices defined in Table. S1. The first barrier value is the forward barrier in direction of the arrow in the "Transition" column ( $a \rightarrow b$ ), and the second value is the reverse barrier ( $a \leftarrow b$ ).

| No. | Transition of O vacancy                                                                                                                                                                                                | Barriers [eV] |            |            |            |            |            |
|-----|------------------------------------------------------------------------------------------------------------------------------------------------------------------------------------------------------------------------|---------------|------------|------------|------------|------------|------------|
|     |                                                                                                                                                                                                                        | Pr            | Nd         | Pm         | Sm         | Eu         | Gd         |
| 1   | 1→2, 1→17, 4→3, 4→20, 13→14, 13→29, 16→15, 16→32, 18→17, 18→2, 19→20, 19→3, 30→29, 30→14, 31→32, 31→15, 34→33, 34→50, 35→36, 35→51, 46→45, 46→62, 47→48, 47→63, 49→50, 49→33, 52→51, 52→36, 61→62, 61→45, 64→63, 64→48 | 0.31, 0.50    | 0.35, 0.48 | 0.38, 0.46 | 0.41, 0.44 | 0.44, 0.42 | 0.46, 0.39 |
| 2   | 1→4, 1→49, 4→1, 4→52, 13→16, 13→61, 16→13, 16→64, 18→19, 18→34, 19→18, 19→35, 30→31, 30→46, 31→30, 31→47, 34→35, 34→18, 35→34, 35→19, 46→47, 46→30, 47→46, 47→31, 49→52, 49→1, 52→49, 52→4, 61→64, 61→13, 64→61, 64→16 | 0.71, 0.71    | 0.66, 0.66 | 0.62, 0.62 | 0.59, 0.59 | 0.55, 0.55 | 0.52, 0.52 |
| 3   | 1→5, 4→8, 13→9, 16→12, 18→22, 19→23, 30→26, 31→27, 34→38, 35→39, 46→42, 47→43, 49→53, 52→56, 61→57, 64→60                                                                                                              | 0.35, 0.42    | 0.38, 0.42 | 0.41, 0.40 | 0.43, 0.39 | 0.45, 0.38 | 0.47, 0.35 |
| 4   | 1→13, 4→16, 13→1, 16→4, 18→30, 19→31, 30→18, 31→19, 34→46, 35→47, 46→34, 47→35, 49→61, 52→64, 61→49, 64→52                                                                                                             | 0.73, 0.73    | 0.69, 0.68 | 0.64, 0.64 | 0.61, 0.61 | 0.57, 0.57 | 0.54, 0.54 |
| 5   | 2→3, 2→50, 3→2, 3→51, 14→15, 14→62, 15→14, 15→63, 17→20, 17→33, 20→17, 20→36, 29→32, 29→45, 32→29, 32→48, 33→36, 33→17, 36→33, 36→20, 45→48, 45→29, 48→45, 48→32, 50→51, 50→2, 51→50, 51→3, 62→63, 62→14, 63→62, 63→15 | 0.41, 0.41    | 0.42, 0.42 | 0.42, 0.42 | 0.43, 0.43 | 0.43, 0.43 | 0.44, 0.44 |
| 6   | 2→1, 2→18, 3→4, 3→19, 14→13, 14→30, 15→16, 15→31, 17→18, 17→1, 20→19, 20→4, 29→30, 29→13, 32→31, 32→16, 33→34, 33→49, 36→35, 36→52, 45→46, 45→61, 48→47, 48→64, 50→49, 50→34, 51→52, 51→35, 62→61, 62→46, 63→64, 63→47 | 0.50, 0.31    | 0.48, 0.35 | 0.46, 0.38 | 0.44, 0.41 | 0.42, 0.44 | 0.39, 0.46 |
| 7   | 2→6, 3→7, 14→10, 15→11, 17→21, 20→24, 29→25, 32→28, 33→37, 36→40, 45→41, 48→44, 50→54, 51→55, 62→58, 63→59                                                                                                             | 0.60, 0.36    | 0.57, 0.38 | 0.54, 0.40 | 0.53, 0.41 | 0.50, 0.42 | 0.48, 0.43 |
| 8   | 2→14, 3→15, 14→2, 15→3, 17→29, 20→32, 29→17, 32→20, 33→45, 36→48, 45→33, 48→36, 50→62, 51→63, 62→50, 63→51                                                                                                             | 0.46, 0.46    | 0.46, 0.46 | 0.46, 0.46 | 0.46, 0.46 | 0.46, 0.46 | 0.46, 0.46 |
| 9   | 5→6, 5→21, 8→7, 8→24, 9→10, 9→25, 12→11, 12→28, 22→21, 22→6, 23→24, 23→7, 26→25, 26→10, 27→28, 27→11, 38→37, 38→54, 39→40, 39→55, 42→41, 42→58, 43→44, 43→59, 53→54, 53→37, 56→55, 56→40, 57→58, 57→41, 60→59, 60→44   | 0.53, 0.40    | 0.51, 0.40 | 0.49, 0.41 | 0.47, 0.42 | 0.46, 0.43 | 0.44, 0.43 |
| 10  | 5→8, 5→53, 8→5, 8→56, 9→12, 9→57, 12→9, 12→60, 22→23, 22→38, 23→22, 23→39, 26→27, 26→42, 27→26, 27→43, 38→39, 38→22, 39→38, 39→23, 42→43, 42→26, 43→42, 43→27, 53→56, 53→5, 56→53, 56→8, 57→60, 57→9, 60→57, 60→12     | 0.44, 0.45    | 0.44, 0.44 | 0.44, 0.44 | 0.44, 0.44 | 0.44, 0.44 | 0.44, 0.44 |
| 11  | 5→9, 8→12, 9→5, 12→8, 22→26, 23→27, 26→22, 27→23, 38→42, 39→43, 42→38, 43→39, 53→57, 56→60, 57→53, 60→56                                                                                                               | 0.39, 0.39    | 0.40, 0.40 | 0.40, 0.40 | 0.41, 0.41 | 0.42, 0.42 | 0.42, 0.42 |
| 12  | 5→1, 8→4, 9→13, 12→16, 22→18, 23→19, 26→30, 27→31, 38→34, 39→35, 42→46, 43→47, 53→49, 56→52, 57→61, 60→64                                                                                                              | 0.42, 0.35    | 0.42, 0.38 | 0.40, 0.41 | 0.39, 0.43 | 0.38, 0.45 | 0.35, 0.47 |
| 13  | 6→7, 6→54, 7→6, 7→55, 10→11, 10→58, 11→10, 11→59, 21→24, 21→37, 24→21, 24→40, 25→28, 25→41, 28→25, 28→44, 37→40, 37→21, 40→37, 40→24, 41→44, 41→25, 44→41, 44→28, 54→55, 54→6, 55→54, 55→7, 58→59, 58→10, 59→58, 59→11 | 0.45, 0.45    | 0.45, 0.45 | 0.44, 0.44 | 0.43, 0.43 | 0.43, 0.43 | 0.42, 0.42 |



|    |                                                                                                                                                                                                                      |            |            |            |            |            |            |
|----|----------------------------------------------------------------------------------------------------------------------------------------------------------------------------------------------------------------------|------------|------------|------------|------------|------------|------------|
| 14 | 6→5, 6→22, 7→8, 7→23, 10→9, 10→26, 11→12, 11→27, 21→22, 21→5, 24→23, 24→8, 25→26, 25→9, 28→27, 28→12, 37→38, 37→53, 40→39, 40→56, 41→42, 41→57, 44→43, 44→60, 54→53, 54→38, 55→56, 55→39, 58→57, 58→42, 59→60, 59→43 | 0.40, 0.53 | 0.40, 0.51 | 0.41, 0.49 | 0.42, 0.47 | 0.43, 0.46 | 0.43, 0.44 |
| 15 | 6→10, 7→11, 10→6, 11→7, 21→25, 24→28, 25→21, 28→24, 37→41, 40→44, 41→37, 44→40, 54→58, 55→59, 58→54, 59→55                                                                                                           | 0.44, 0.44 | 0.43, 0.43 | 0.43, 0.43 | 0.42, 0.42 | 0.42, 0.42 | 0.41, 0.41 |
| 16 | 6→2, 7→3, 10→14, 11→15, 21→17, 24→20, 25→29, 28→32, 37→33, 40→36, 41→45, 44→48, 54→50, 55→51, 58→62, 59→63                                                                                                           | 0.36, 0.60 | 0.38, 0.57 | 0.40, 0.54 | 0.41, 0.53 | 0.42, 0.50 | 0.43, 0.48 |

TABLE S5: Oxygen vacancy diffusion barriers for dopants in distribution IV (see Fig. S1). Transitions are between oxygen sites with indices defined in Table. S1. The first barrier value is the forward barrier in direction of the arrow in the "Transition" column ( $a \rightarrow b$ ), and the second value is the reverse barrier ( $a \leftarrow b$ ).

| No. | Transition of O vacancy                                                                                                                                                                                                                                                                                                                                                                                                                                                                                                                                                                                                                                                                                                                                                                                                                                                                                                                                                                                                                                                                                                                                                                                                                                                                                                                                                                                                                                                                                                                                                                                                                                                                                                                                                                                                                                                                                                                                                                                                                                            | Barriers [eV] |            |            |            |            |            |
|-----|--------------------------------------------------------------------------------------------------------------------------------------------------------------------------------------------------------------------------------------------------------------------------------------------------------------------------------------------------------------------------------------------------------------------------------------------------------------------------------------------------------------------------------------------------------------------------------------------------------------------------------------------------------------------------------------------------------------------------------------------------------------------------------------------------------------------------------------------------------------------------------------------------------------------------------------------------------------------------------------------------------------------------------------------------------------------------------------------------------------------------------------------------------------------------------------------------------------------------------------------------------------------------------------------------------------------------------------------------------------------------------------------------------------------------------------------------------------------------------------------------------------------------------------------------------------------------------------------------------------------------------------------------------------------------------------------------------------------------------------------------------------------------------------------------------------------------------------------------------------------------------------------------------------------------------------------------------------------------------------------------------------------------------------------------------------------|---------------|------------|------------|------------|------------|------------|
|     |                                                                                                                                                                                                                                                                                                                                                                                                                                                                                                                                                                                                                                                                                                                                                                                                                                                                                                                                                                                                                                                                                                                                                                                                                                                                                                                                                                                                                                                                                                                                                                                                                                                                                                                                                                                                                                                                                                                                                                                                                                                                    | Pr            | Nd         | Pm         | Sm         | Eu         | Gd         |
| 1   | 1 $\rightarrow$ 2, 1 $\rightarrow$ 5, 1 $\rightarrow$ 17, 4 $\rightarrow$ 3, 4 $\rightarrow$ 8, 4 $\rightarrow$ 20, 13 $\rightarrow$ 14, 13 $\rightarrow$ 9, 13 $\rightarrow$ 29, 16 $\rightarrow$ 15, 16 $\rightarrow$ 12, 16 $\rightarrow$ 32, 22 $\rightarrow$ 21, 22 $\rightarrow$ 18, 22 $\rightarrow$ 6, 23 $\rightarrow$ 24, 23 $\rightarrow$ 19, 23 $\rightarrow$ 7, 26 $\rightarrow$ 25, 26 $\rightarrow$ 30, 26 $\rightarrow$ 10, 27 $\rightarrow$ 28, 27 $\rightarrow$ 31, 27 $\rightarrow$ 11, 38 $\rightarrow$ 37, 38 $\rightarrow$ 34, 38 $\rightarrow$ 54, 39 $\rightarrow$ 40, 39 $\rightarrow$ 35, 39 $\rightarrow$ 55, 42 $\rightarrow$ 41, 42 $\rightarrow$ 46, 42 $\rightarrow$ 58, 43 $\rightarrow$ 44, 43 $\rightarrow$ 47, 43 $\rightarrow$ 59, 49 $\rightarrow$ 50, 49 $\rightarrow$ 53, 49 $\rightarrow$ 33, 52 $\rightarrow$ 51, 52 $\rightarrow$ 56, 52 $\rightarrow$ 36, 61 $\rightarrow$ 62, 61 $\rightarrow$ 57, 61 $\rightarrow$ 45, 64 $\rightarrow$ 63, 64 $\rightarrow$ 60, 64 $\rightarrow$ 48                                                                                                                                                                                                                                                                                                                                                                                                                                                                                                                                                                                                                                                                                                                                                                                                                                                                                                                                                                                                                                  | 0.35, 0.42    | 0.38, 0.42 | 0.40, 0.41 | 0.42, 0.40 | 0.44, 0.39 | 0.45, 0.37 |
| 2   | 1 $\rightarrow$ 4, 1 $\rightarrow$ 13, 1 $\rightarrow$ 49, 4 $\rightarrow$ 1, 4 $\rightarrow$ 16, 4 $\rightarrow$ 52, 13 $\rightarrow$ 16, 13 $\rightarrow$ 1, 13 $\rightarrow$ 61, 16 $\rightarrow$ 13, 16 $\rightarrow$ 4, 16 $\rightarrow$ 64, 22 $\rightarrow$ 23, 22 $\rightarrow$ 26, 22 $\rightarrow$ 38, 23 $\rightarrow$ 22, 23 $\rightarrow$ 27, 23 $\rightarrow$ 39, 26 $\rightarrow$ 27, 26 $\rightarrow$ 22, 26 $\rightarrow$ 42, 27 $\rightarrow$ 26, 27 $\rightarrow$ 23, 27 $\rightarrow$ 43, 38 $\rightarrow$ 39, 38 $\rightarrow$ 42, 38 $\rightarrow$ 22, 39 $\rightarrow$ 38, 39 $\rightarrow$ 43, 39 $\rightarrow$ 23, 42 $\rightarrow$ 43, 42 $\rightarrow$ 38, 42 $\rightarrow$ 26, 43 $\rightarrow$ 42, 43 $\rightarrow$ 39, 43 $\rightarrow$ 27, 49 $\rightarrow$ 52, 49 $\rightarrow$ 61, 49 $\rightarrow$ 1, 52 $\rightarrow$ 49, 52 $\rightarrow$ 64, 52 $\rightarrow$ 4, 61 $\rightarrow$ 64, 61 $\rightarrow$ 49, 61 $\rightarrow$ 13, 64 $\rightarrow$ 61, 64 $\rightarrow$ 52, 64 $\rightarrow$ 16                                                                                                                                                                                                                                                                                                                                                                                                                                                                                                                                                                                                                                                                                                                                                                                                                                                                                                                                                                                                                                 | 0.70, 0.70    | 0.66, 0.66 | 0.62, 0.62 | 0.59, 0.59 | 0.56, 0.56 | 0.53, 0.53 |
| 3   | 2 $\rightarrow$ 3, 3 $\rightarrow$ 2, 5 $\rightarrow$ 9, 6 $\rightarrow$ 54, 7 $\rightarrow$ 55, 8 $\rightarrow$ 12, 9 $\rightarrow$ 5, 10 $\rightarrow$ 58, 11 $\rightarrow$ 59, 12 $\rightarrow$ 8, 14 $\rightarrow$ 15, 15 $\rightarrow$ 14, 17 $\rightarrow$ 33, 18 $\rightarrow$ 30, 19 $\rightarrow$ 31, 20 $\rightarrow$ 36, 21 $\rightarrow$ 24, 24 $\rightarrow$ 21, 25 $\rightarrow$ 28, 28 $\rightarrow$ 25, 29 $\rightarrow$ 45, 30 $\rightarrow$ 18, 31 $\rightarrow$ 19, 32 $\rightarrow$ 48, 33 $\rightarrow$ 17, 34 $\rightarrow$ 46, 35 $\rightarrow$ 47, 36 $\rightarrow$ 20, 37 $\rightarrow$ 40, 40 $\rightarrow$ 37, 41 $\rightarrow$ 44, 44 $\rightarrow$ 41, 45 $\rightarrow$ 29, 46 $\rightarrow$ 34, 47 $\rightarrow$ 35, 48 $\rightarrow$ 32, 50 $\rightarrow$ 51, 51 $\rightarrow$ 50, 53 $\rightarrow$ 57, 54 $\rightarrow$ 6, 55 $\rightarrow$ 7, 56 $\rightarrow$ 60, 57 $\rightarrow$ 53, 58 $\rightarrow$ 10, 59 $\rightarrow$ 11, 60 $\rightarrow$ 56, 62 $\rightarrow$ 63, 63 $\rightarrow$ 62                                                                                                                                                                                                                                                                                                                                                                                                                                                                                                                                                                                                                                                                                                                                                                                                                                                                                                                                                                                                                                   | 0.41, 0.41    | 0.41, 0.41 | 0.42, 0.42 | 0.42, 0.42 | 0.42, 0.42 | 0.42, 0.42 |
| 4   | 2 $\rightarrow$ 1, 3 $\rightarrow$ 4, 5 $\rightarrow$ 1, 6 $\rightarrow$ 22, 7 $\rightarrow$ 23, 8 $\rightarrow$ 4, 9 $\rightarrow$ 13, 10 $\rightarrow$ 26, 11 $\rightarrow$ 27, 12 $\rightarrow$ 16, 14 $\rightarrow$ 13, 15 $\rightarrow$ 16, 17 $\rightarrow$ 1, 18 $\rightarrow$ 22, 19 $\rightarrow$ 23, 20 $\rightarrow$ 4, 21 $\rightarrow$ 22, 24 $\rightarrow$ 23, 25 $\rightarrow$ 26, 28 $\rightarrow$ 27, 29 $\rightarrow$ 13, 30 $\rightarrow$ 26, 31 $\rightarrow$ 27, 32 $\rightarrow$ 16, 33 $\rightarrow$ 49, 34 $\rightarrow$ 38, 35 $\rightarrow$ 39, 36 $\rightarrow$ 52, 37 $\rightarrow$ 38, 40 $\rightarrow$ 39, 41 $\rightarrow$ 42, 44 $\rightarrow$ 43, 45 $\rightarrow$ 61, 46 $\rightarrow$ 42, 47 $\rightarrow$ 43, 48 $\rightarrow$ 64, 50 $\rightarrow$ 49, 51 $\rightarrow$ 52, 53 $\rightarrow$ 49, 54 $\rightarrow$ 38, 55 $\rightarrow$ 39, 56 $\rightarrow$ 52, 57 $\rightarrow$ 61, 58 $\rightarrow$ 42, 59 $\rightarrow$ 43, 60 $\rightarrow$ 64, 62 $\rightarrow$ 61, 63 $\rightarrow$ 64                                                                                                                                                                                                                                                                                                                                                                                                                                                                                                                                                                                                                                                                                                                                                                                                                                                                                                                                                                                                                                  | 0.42, 0.35    | 0.42, 0.38 | 0.41, 0.40 | 0.40, 0.42 | 0.39, 0.44 | 0.37, 0.45 |
| 5   | 2 $\rightarrow$ 6, 2 $\rightarrow$ 18, 3 $\rightarrow$ 7, 3 $\rightarrow$ 19, 5 $\rightarrow$ 6, 5 $\rightarrow$ 21, 6 $\rightarrow$ 5, 6 $\rightarrow$ 2, 7 $\rightarrow$ 8, 7 $\rightarrow$ 3, 8 $\rightarrow$ 7, 8 $\rightarrow$ 24, 9 $\rightarrow$ 10, 9 $\rightarrow$ 25, 10 $\rightarrow$ 9, 10 $\rightarrow$ 14, 11 $\rightarrow$ 12, 11 $\rightarrow$ 15, 12 $\rightarrow$ 11, 12 $\rightarrow$ 28, 14 $\rightarrow$ 10, 14 $\rightarrow$ 30, 15 $\rightarrow$ 11, 15 $\rightarrow$ 31, 17 $\rightarrow$ 18, 17 $\rightarrow$ 21, 18 $\rightarrow$ 17, 18 $\rightarrow$ 2, 19 $\rightarrow$ 20, 19 $\rightarrow$ 3, 20 $\rightarrow$ 19, 20 $\rightarrow$ 24, 21 $\rightarrow$ 17, 21 $\rightarrow$ 5, 24 $\rightarrow$ 20, 24 $\rightarrow$ 8, 25 $\rightarrow$ 29, 25 $\rightarrow$ 9, 28 $\rightarrow$ 32, 28 $\rightarrow$ 12, 29 $\rightarrow$ 30, 29 $\rightarrow$ 25, 30 $\rightarrow$ 29, 30 $\rightarrow$ 14, 31 $\rightarrow$ 32, 31 $\rightarrow$ 15, 32 $\rightarrow$ 31, 32 $\rightarrow$ 28, 33 $\rightarrow$ 34, 33 $\rightarrow$ 37, 34 $\rightarrow$ 33, 34 $\rightarrow$ 50, 35 $\rightarrow$ 36, 35 $\rightarrow$ 51, 36 $\rightarrow$ 35, 36 $\rightarrow$ 40, 37 $\rightarrow$ 33, 37 $\rightarrow$ 53, 40 $\rightarrow$ 36, 40 $\rightarrow$ 56, 41 $\rightarrow$ 45, 41 $\rightarrow$ 57, 44 $\rightarrow$ 48, 44 $\rightarrow$ 60, 45 $\rightarrow$ 46, 45 $\rightarrow$ 41, 46 $\rightarrow$ 45, 46 $\rightarrow$ 62, 47 $\rightarrow$ 48, 47 $\rightarrow$ 63, 48 $\rightarrow$ 47, 48 $\rightarrow$ 44, 50 $\rightarrow$ 54, 50 $\rightarrow$ 34, 51 $\rightarrow$ 55, 51 $\rightarrow$ 35, 53 $\rightarrow$ 54, 53 $\rightarrow$ 37, 54 $\rightarrow$ 53, 54 $\rightarrow$ 50, 55 $\rightarrow$ 56, 55 $\rightarrow$ 51, 56 $\rightarrow$ 55, 56 $\rightarrow$ 40, 57 $\rightarrow$ 58, 57 $\rightarrow$ 41, 58 $\rightarrow$ 57, 58 $\rightarrow$ 62, 59 $\rightarrow$ 60, 59 $\rightarrow$ 63, 60 $\rightarrow$ 59, 60 $\rightarrow$ 44, 62 $\rightarrow$ 58, 62 $\rightarrow$ 46, 63 $\rightarrow$ 59, 63 $\rightarrow$ 47 | 0.48, 0.48    | 0.47, 0.47 | 0.47, 0.47 | 0.46, 0.46 | 0.46, 0.46 | 0.46, 0.46 |

|   |                                                                                                                                                                                                                                                                                                                                                                                                                                                                                                                                                                                                                                                                                                           |            |            |            |            |            |            |
|---|-----------------------------------------------------------------------------------------------------------------------------------------------------------------------------------------------------------------------------------------------------------------------------------------------------------------------------------------------------------------------------------------------------------------------------------------------------------------------------------------------------------------------------------------------------------------------------------------------------------------------------------------------------------------------------------------------------------|------------|------------|------------|------------|------------|------------|
| 6 | 2→14, 2→50, 3→15, 3→51, 5→8, 5→53, 6→7, 6→10, 7→6,<br>7→11, 8→5, 8→56, 9→12, 9→57, 10→11, 10→6, 11→10,<br>11→7, 12→9, 12→60, 14→2, 14→62, 15→3, 15→63,<br>17→20, 17→29, 18→19, 18→34, 19→18, 19→35, 20→17,<br>20→32, 21→25, 21→37, 24→28, 24→40, 25→21, 25→41,<br>28→24, 28→44, 29→32, 29→17, 30→31, 30→46, 31→30,<br>31→47, 32→29, 32→20, 33→36, 33→45, 34→35, 34→18,<br>35→34, 35→19, 36→33, 36→48, 37→41, 37→21, 40→44,<br>40→24, 41→37, 41→25, 44→40, 44→28, 45→48, 45→33,<br>46→47, 46→30, 47→46, 47→31, 48→45, 48→36, 50→62,<br>50→2, 51→63, 51→3, 53→56, 53→5, 54→55, 54→58,<br>55→54, 55→59, 56→53, 56→8, 57→60, 57→9, 58→59,<br>58→54, 59→58, 59→55, 60→57, 60→12, 62→50, 62→14,<br>63→51, 63→15 | 0.45, 0.45 | 0.45, 0.45 | 0.44, 0.44 | 0.44, 0.44 | 0.44, 0.44 | 0.43, 0.43 |
|---|-----------------------------------------------------------------------------------------------------------------------------------------------------------------------------------------------------------------------------------------------------------------------------------------------------------------------------------------------------------------------------------------------------------------------------------------------------------------------------------------------------------------------------------------------------------------------------------------------------------------------------------------------------------------------------------------------------------|------------|------------|------------|------------|------------|------------|

## S4. DIFFUSION CONSTANT FOR DIFFERENT DISTRIBUTIONS

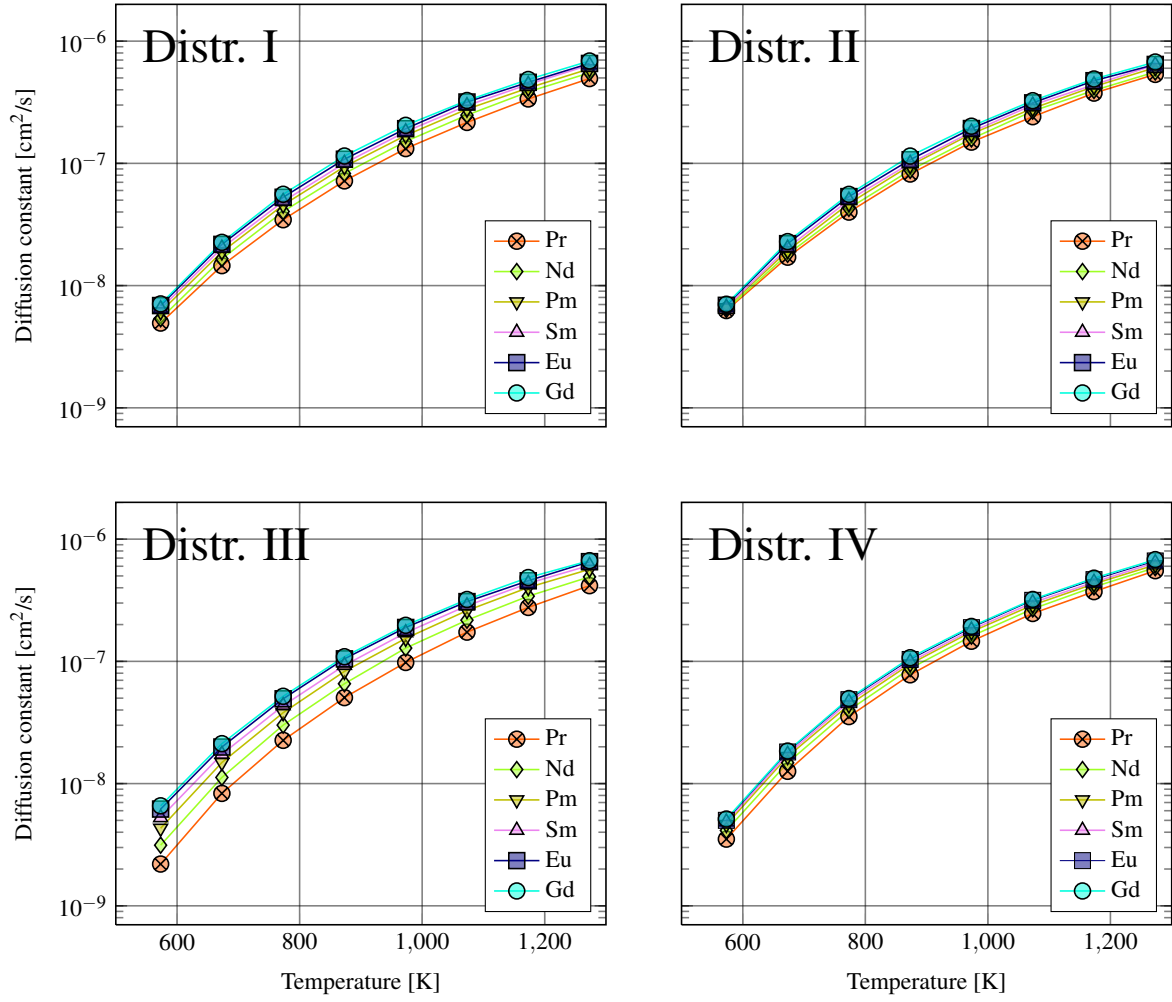

FIG. S2. Diffusion constant versus temperature for dopant distributions I–IV (see Fig. S1).

## S5. SYMMETRY OF BARRIERS

TABLE S6. Average ion diffusion barriers symmetry  $\langle dE \rangle^n = \frac{1}{N^n} \sum_i^{N^n} dE_i$ , where  $N^n$  is the total number of barriers in the system for distribution  $n \in \{I, II, III, IV\}$ .  $dE_i = |\Delta E_i^{fwd} - \Delta E_i^{bwd}|$  is the difference between the forward and backward barrier for barrier number  $i$ . The diffusion barrier averaged over the distributions (I–IV) is  $\langle dE \rangle^{Avg} = \frac{1}{4}(\langle dE \rangle^I + \langle dE \rangle^{II} + \langle dE \rangle^{III} + \langle dE \rangle^{IV})$ . Bold face numbers indicate the lowest average barrier in each column.

| Dopant | Average barrier symmetry [eV] |                           |                            |                           |                            |
|--------|-------------------------------|---------------------------|----------------------------|---------------------------|----------------------------|
|        | $\langle dE \rangle^I$        | $\langle dE \rangle^{II}$ | $\langle dE \rangle^{III}$ | $\langle dE \rangle^{IV}$ | $\langle dE \rangle^{Avg}$ |
| Pr     | 0.0746                        | 0.0287                    | 0.0795                     | 0.0165                    | 0.0498                     |
| Nd     | 0.0563                        | 0.0271                    | 0.0583                     | 0.0094                    | 0.0378                     |
| Pm     | <b>0.0401</b>                 | <b>0.0265</b>             | 0.0371                     | <b>0.0015</b>             | 0.0263                     |
| Sm     | 0.0402                        | 0.0268                    | 0.0267                     | 0.0051                    | <b>0.0247</b>              |
| Eu     | 0.0407                        | 0.0271                    | <b>0.0214</b>              | 0.0125                    | 0.0254                     |
| Gd     | 0.0432                        | 0.0287                    | 0.0272                     | 0.0205                    | 0.0299                     |
